# Supplementary material for: Using hexamers to predict cis-regulatory motifs in Drosophila
Source: Springer Nature journal article supplement (doi:10.1186/1471-2105-6-262), 2005-10-27

### Additional file 5

This graph was generated by taking the combination of parameters that gave the best performance (number of nmers: 80, window size: 1700 bp, threshold: 130) on the training set and holding two of the parameters constant, while varying the third. The number of nmers was varied between 30-80 in steps of 10, the window size was varied between 1000 and 2000 in steps of 100, and the threshold was varied between 0 and 200 in steps of 10. Note that varying the number of nmers without changing the other two parameters gave a maximum sensitivity of around 0.42. Varying the window size gave a maximum sensitivity of 0.68.

ROC curves were not prepared for the other algorithms as most of them had more parameters than HexDiff, making it difficult to summarize their performance into a practical number of ROC curves. For comparing the different algorithms, please refer to Tables 2 and 3 of the manuscript.

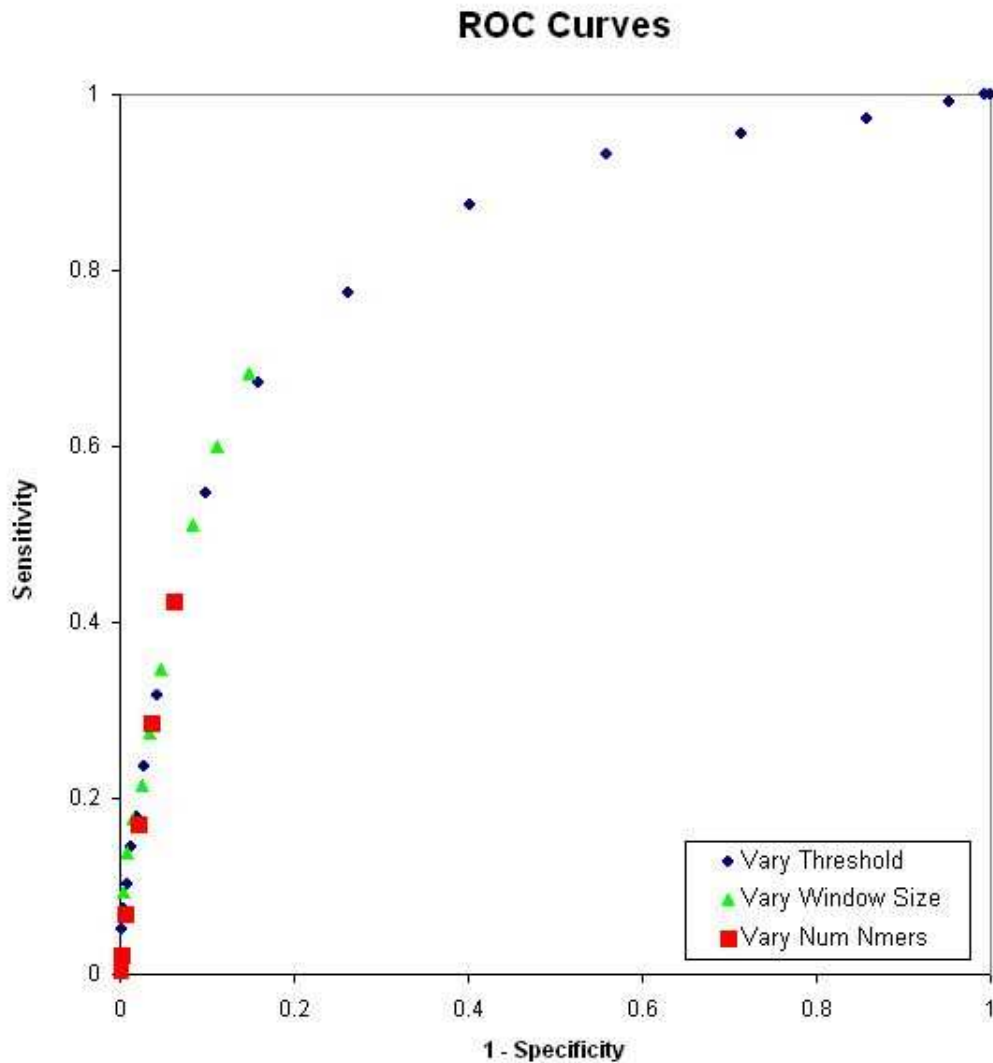

Supplement: Additional file 5 [file 1471-2105-6-262-s5.pdf]
